# Supplementary material for: Combination of Stable Isotope Analysis and Chemometrics to Discriminate Geoclimatically and Temporally the Virgin Olive Oils from Three Mediterranean Countries
Source: PubMed Central journal article supplement (PMC7763173; doi:10.3390/foods9121855), 2020-12-12
Supplement: foods-09-01855-s001.pdf [file foods-09-01855-s001.pdf]

Table S1. Varieties, origin, region, geo-climatic information and stable isotope composition of EVOO samples.

| Country and year | Sample code | Latitude (UTM) | Longitude (UTM) | Altitude (m a.s.l.) | Rainfall (mm) | Temperature (°C) | Sea distance (km) | $\delta^{13}\text{C}$ (mUr, VPDB) | $\delta^{18}\text{O}$ (mUr, VSMOW) | $\delta^2\text{H}$ (mUr, VSMOW) |
|------------------|-------------|----------------|-----------------|---------------------|---------------|------------------|-------------------|-----------------------------------|------------------------------------|---------------------------------|
| France<br>2016   | AG001       | 43.55          | 5.16            | 50                  | 515.2         | 15.62            | 23.09             | -30.9                             | 22.0                               | -162.3                          |
|                  | AG026       | 43.37          | 5.65            | 240                 | 515.2         | 15.4             | 20.32             | -29.0                             | 22.6                               | -162.9                          |
|                  | AG032       | 43.89          | 5.14            | 150                 | 515.2         | 15.62            | 55.77             | -29.1                             | 22.6                               | -160.7                          |
|                  | AG035       | 44.03          | 5.98            | 400                 | 788.7         | 11.59            | 100.7             | -29.5                             | 21.8                               | -166.2                          |
|                  | AG037       | 43.84          | 5.79            | 450                 | 515.2         | 13.9             | 75.65             | -29.2                             | 21.9                               | -168.4                          |
|                  | AG044       | 43.83          | 5.96            | 550                 | 515.2         | 13.9             | 78.83             | -28.8                             | 23.2                               | -147.5                          |
|                  | CA007       | 44.46          | 4.40            | 240                 | 953.5         | 13.85            | 111.1             | -29.6                             | 22.9                               | -144.4                          |
|                  | CA022       | 43.67          | 6.98            | 300                 | 713.7         | 12.73            | 13.55             | -29.7                             | 20.9                               | -147.9                          |
|                  | CA051       | 43.68          | 6.97            | 350                 | 713.7         | 12.73            | 14.77             | -29.6                             | 20.9                               | -153.8                          |
|                  | CA085       | 43.79          | 7.22            | 200                 | 760           | 14.48            | 11.17             | -30.4                             | 19.9                               | -151.4                          |
|                  | OL052       | 43.41          | 3.17            | 60                  | 902.6         | 18.1             | 22.05             | -29.0                             | 21.5                               | -149.8                          |
|                  | OL053       | 43.63          | 3.45            | 90                  | 902.6         | 13.95            | 31.41             | -29.3                             | 22.0                               | -154.8                          |
|                  | OL067       | 43.26          | 3.26            | 20                  | 902.6         | 18.1             | 4.24              | -31.5                             | 23.5                               | -143.9                          |
|                  | PI042       | 43.23          | 2.65            | 50                  | 822.1         | 16.3             | 40.61             | -29.0                             | 23.7                               | -141.8                          |
|                  | PI048       | 43.63          | 3.45            | 90                  | 902.6         | 14.0             | 31.41             | -31.0                             | 24.7                               | -144.9                          |
|                  | PI049       | 43.64          | 4.81            | 20                  | 582.4         | 16.7             | 29.58             | -30.1                             | 22.2                               | -163.0                          |
|                  | PI072       | 43.72          | 4.42            | 80                  | 582.4         | 16.5             | 29.69             | -28.2                             | 23.7                               | -153.7                          |
|                  | SA014       | 43.55          | 5.23            | 100                 | 515.2         | 15.62            | 27.33             | -28.7                             | 24.1                               | -156.9                          |
|                  | SA015       | 43.72          | 4.84            | 40                  | 582.4         | 16.7             | 40.99             | -28.2                             | 25.3                               | -153.8                          |
|                  | SA030       | 43.74          | 4.72            | 30                  | 582.4         | 16.7             | 34.75             | -27.6                             | 24.7                               | -172.8                          |
|                  | SA031       | 43.73          | 4.74            | 50                  | 582.4         | 16.7             | 35.16             | -29.9                             | 23.1                               | -186.7                          |
|                  | TA054       | 44.39          | 5.10            | 400                 | 788.7         | 13               | 114.52            | -28.8                             | 26.4                               | -146.7                          |
|                  | TA055       | 44.37          | 5.13            | 400                 | 788.7         | 13               | 117.07            | -29.5                             | 25.6                               | -142.9                          |
|                  | TA078       | 44.36          | 5.13            | 300                 | 788.7         | 13               | 117.07            | -29.4                             | 25.9                               | -151.2                          |
|                  | TA080       | 44.36          | 5.14            | 300                 | 788.7         | 13               | 117.07            | -29.1                             | 25.7                               | -152.5                          |

Table S1. Continue

| Country and year | Sample code | Latitude (UTM) | Longitude (UTM) | Altitude (m a.s.l.) | Rainfall (mm) | Temperature (°C) | Sea distance (km) | $\delta^{13}\text{C}$ (mUr, VPDB) | $\delta^{18}\text{O}$ (mUr, VSMOW) | $\delta^2\text{H}$ (mUr, VSMOW) |
|------------------|-------------|----------------|-----------------|---------------------|---------------|------------------|-------------------|-----------------------------------|------------------------------------|---------------------------------|
| France           | AG210       | 43.37          | 5.65            | 240                 | 367.4         | 15.84            | 19.84             | -28.3                             | 23.0                               | -152.9                          |
| 2017             | AG217       | 43.84          | 5.79            | 450                 | 367.4         | 14.15            | 77.91             | -29.0                             | 21.7                               | -161.6                          |
|                  | AG219       | 43.83          | 5.96            | 550                 | 367.4         | 14.15            | 81.21             | -27.1                             | 22.3                               | -141.1                          |
|                  | AG256       | 43.89          | 5.14            | 150                 | 367.4         | 16               | 62.33             | -27.8                             | 23.3                               | -127.1                          |
|                  | AG261       | 44.03          | 5.98            | 400                 | 587.5         | 11.85            | 97.79             | -29.6                             | 21.5                               | -168.4                          |
|                  | AG263       | 43.55          | 5.16            | 50                  | 367.4         | 16               | 24.46             | -29.5                             | 21.2                               | -163.7                          |
|                  | CA231       | 43.79          | 7.22            | 200                 | 559.3         | 14.7             | 11.26             | -29.0                             | 21.9                               | -155.2                          |
|                  | CA266       | 43.63          | 6.85            | 380                 | 490.5         | 12.98            | 13.28             | -27.9                             | 21.9                               | -144.7                          |
|                  | CA267       | 43.72          | 7.15            | 230                 | 559.3         | 14.7             | 6.75              | -28.4                             | 21.8                               | -142.5                          |
|                  | CA268       | 43.67          | 6.98            | 300                 | 490.5         | 12.98            | 13.99             | -27.8                             | 21.1                               | -147.3                          |
|                  | OL220       | 43.41          | 3.17            | 60                  | 575.3         | 18.19            | 21.01             | -30.5                             | 21.9                               | -153.9                          |
|                  | OL221       | 43.63          | 3.45            | 90                  | 575.3         | 14.01            | 33.2              | -30.4                             | 21.6                               | -158.4                          |
|                  | OL273       | 43.26          | 3.26            | 20                  | 575.3         | 18.19            | 2.77              | -31.6                             | 20.8                               | -147.9                          |
|                  | OL236       | 43.24          | 2.79            | 40                  | 790.5         | 16.38            | 31.02             | -29.7                             | 20.1                               | -148.2                          |
|                  | PI242       | 43.82          | 4.02            | 90                  | 320.6         | 16.75            | 28.72             | -29.5                             | 20.8                               | -142.4                          |
|                  | PI244       | 43.72          | 4.42            | 80                  | 320.6         | 16.75            | 29.96             | -28.2                             | 20.5                               | -149.2                          |
|                  | PI277       | 43.24          | 2.79            | 40                  | 790.5         | 16.38            | 31.02             | -27.1                             | 20.2                               | -149.6                          |
|                  | SA226       | 43.72          | 4.84            | 40                  | 320.6         | 17.14            | 37.63             | -30.0                             | 20.1                               | -178.2                          |
|                  | SA228       | 43.73          | 4.74            | 50                  | 320.6         | 17.14            | 34.93             | -28.3                             | 22.0                               | -163.6                          |
|                  | SA282       | 43.59          | 5.13            | 100                 | 367.4         | 16               | 29.21             | -29.6                             | 21.9                               | -164.1                          |
|                  | SA286       | 43.74          | 4.72            | 30                  | 320.6         | 17.14            | 34.86             | -29.7                             | 22.0                               | -165.2                          |
|                  | TA248       | 44.36          | 5.14            | 300                 | 587.5         | 13.34            | 115.95            | -28.6                             | 22.2                               | -145.5                          |
|                  | TA249       | 44.36          | 5.13            | 300                 | 587.5         | 13.34            | 115.95            | -28.7                             | 22.0                               | -141.4                          |
|                  | TA290       | 44.37          | 5.14            | 380                 | 587.5         | 13.34            | 115.95            | -28.5                             | 22.4                               | -143.6                          |
|                  | TA291       | 44.37          | 5.10            | 400                 | 587.5         | 13.34            | 115.95            | -28.8                             | 22.0                               | -149.4                          |

Table S1. Continue

| Country and year | Sample code | Latitude (UTM) | Longitude (UTM) | Altitude (m a.s.l.) | Rainfall (mm) | Temperature (°C) | Sea distance (km) | $\delta^{13}\text{C}$ (mUr, VPDB) | $\delta^{18}\text{O}$ (mUr, VSMOW) | $\delta^2\text{H}$ (mUr, VSMOW) |
|------------------|-------------|----------------|-----------------|---------------------|---------------|------------------|-------------------|-----------------------------------|------------------------------------|---------------------------------|
| Portugal<br>2016 | Cob 1       | 38.17          | -7.72           | 163                 | 679.3         | 18.01            | 92.76             | -29.8                             | 23.7                               | -138.5                          |
|                  | Cob 3       | 38.06          | -8.11           | 140                 | 738.1         | 18.17            | 61.99             | -30.8                             | 23.0                               | -137.5                          |
|                  | Cob 4       | 38.17          | -7.72           | 163                 | 679.3         | 18.01            | 92.76             | -30.4                             | 23.0                               | -138.9                          |
|                  | Cob 5       | 38.88          | -7.16           | 328                 | 679.3         | 17.6             | 197.1             | -29.0                             | 23.4                               | -142.3                          |
|                  | Cob 6       | 38.17          | -7.72           | 163                 | 679.3         | 18.01            | 92.76             | -29.5                             | 25.5                               | -131.3                          |
|                  | Cob 7       | 38.41          | -7.72           | 190                 | 679.3         | 18.01            | 96.27             | -29.1                             | 22.9                               | -136.9                          |
|                  | Cob 8       | 38.88          | -7.16           | 328                 | 679.3         | 17.6             | 197.1             | -28.6                             | 22.2                               | -143.8                          |
|                  | Cor 1       | 38.88          | -7.16           | 328                 | 679.3         | 17.6             | 197.1             | -29.1                             | 22.9                               | -143.0                          |
|                  | Cor 2       | 38.17          | -7.72           | 163                 | 679.3         | 18.01            | 92.76             | -30.2                             | 22.3                               | -140.0                          |
|                  | Cor 3       | 38.06          | -8.11           | 140                 | 738.1         | 18.17            | 61.99             | -30.2                             | 22.9                               | -139.2                          |
|                  | Cor 4       | 37.94          | -7.60           | 218                 | 625.3         | 18.41            | 114.17            | -29.1                             | 24.0                               | -138.9                          |
|                  | Gal 1       | 38.06          | -8.11           | 140                 | 738.1         | 18.17            | 61.99             | -29.8                             | 25.9                               | -132.0                          |
|                  | Gal 2       | 38.36          | -7.29           | 186                 | 679.3         | 17.99            | 132.69            | -29.1                             | 22.4                               | -133.3                          |
|                  | Gal 4       | 38.88          | -7.16           | 328                 | 679.3         | 17.6             | 197.1             | -28.9                             | 23.0                               | -135.1                          |
|                  | Verd 1      | 38.88          | -7.16           | 328                 | 679.3         | 17.6             | 197.1             | -29.0                             | 23.1                               | -140.0                          |
|                  | Bla 1       | 38.88          | -7.16           | 328                 | 679.3         | 17.6             | 197.1             | -27.9                             | 21.2                               | -132.3                          |
|                  | Mad 1       | 38.88          | -7.16           | 328                 | 679.3         | 17.6             | 197.1             | -29.9                             | 23.3                               | -137.5                          |
|                  | Arb 1       | 38.88          | -7.16           | 328                 | 679.3         | 17.6             | 197.1             | -29.6                             | 21.3                               | -139.8                          |
|                  | Arb 3       | 38.41          | -7.72           | 190                 | 679.3         | 18.01            | 96.27             | -29.2                             | 22.3                               | -132.4                          |
|                  | Arb 4       | 38.17          | -7.72           | 163                 | 679.3         | 18.01            | 92.76             | -29.9                             | 22.7                               | -138.2                          |
|                  | Arb 5       | 38.06          | -8.11           | 140                 | 738.1         | 18.17            | 61.99             | -31.1                             | 23.5                               | -138.2                          |
|                  | Car 1       | 38.88          | -7.16           | 328                 | 679.3         | 17.6             | 197.1             | -30.1                             | 24.5                               | -130.7                          |
|                  | Azei 1      | 38.88          | -7.16           | 328                 | 679.3         | 17.6             | 197.1             | -29.3                             | 22.6                               | -143.6                          |
|                  | Pic 1       | 38.88          | -7.16           | 328                 | 679.3         | 17.6             | 197.1             | -30.5                             | 21.7                               | -146.6                          |
|                  | Pic 3       | 38.41          | -7.72           | 190                 | 679.3         | 18.01            | 96.27             | -30.4                             | 22.2                               | -139.5                          |
| Pic 4            | 38.17       | -7.72          | 163             | 679.3               | 18.01         | 92.76            | -30.1             | 22.9                              | -140.6                             |                                 |
| Pic 5            | 38.06       | -8.11          | 140             | 738.1               | 18.17         | 61.99            | -31.8             | 21.4                              | -140.1                             |                                 |

Table S1. Continue

| Country and year | Sample code | Latitude (UTM) | Longitude (UTM) | Altitude (m a.s.l.) | Rainfall (mm) | Temperature (°C) | Sea distance (km) | $\delta^{13}\text{C}$ (mUr, VPDB) | $\delta^{18}\text{O}$ (mUr, VSMOW) | $\delta^2\text{H}$ (mUr, VSMOW) |
|------------------|-------------|----------------|-----------------|---------------------|---------------|------------------|-------------------|-----------------------------------|------------------------------------|---------------------------------|
| Portugal<br>2017 | Gal1        | 39.07          | -7.46           | 308                 | 378           | 16.95            | 160.35            | -29.5                             | 25.5                               | -133.1                          |
|                  | Gal4        | 38.08          | -7.27           | 193                 | 440.7         | 18.52            | 142.85            | -30.4                             | 27.6                               | -148.9                          |
|                  | Gal11       | 37.94          | -7.44           | 229                 | 475.9         | 18.48            | 127.7             | -29.2                             | 24.6                               | -147.7                          |
|                  | Gal13       | 38.55          | -7.84           | 263                 | 440.7         | 18.55            | 88.91             | -29.5                             | 25.9                               | -148.8                          |
|                  | Gal18       | 38.88          | -7.16           | 322                 | 440.7         | 18.18            | 153.94            | -30.0                             | 26.0                               | -155.6                          |
|                  | Gal21       | 40.38          | -7.93           | 364                 | 577.4         | 14.49            | 83.72             | -29.3                             | 25.8                               | -150.2                          |
|                  | Arb1        | 38.08          | -7.27           | 193                 | 440.7         | 18.52            | 142.85            | -28.9                             | 27.0                               | -150.2                          |
|                  | Arb2        | 37.94          | -7.44           | 229                 | 475.9         | 18.48            | 127.7             | -29.8                             | 23.5                               | -139.4                          |
|                  | Arb4        | 38.55          | -7.84           | 263                 | 440.7         | 18.55            | 88.91             | -29.6                             | 24.5                               | -146.5                          |
|                  | Arb7        | 38.88          | -7.16           | 322                 | 440.7         | 18.18            | 153.94            | -29.0                             | 23.8                               | -126.8                          |
|                  | Arb10       | 38.17          | -7.76           | 157                 | 440.7         | 18.55            | 97.36             | -30.1                             | 24.5                               | -140.8                          |
|                  | Arb11       | 38.06          | -8.11           | 136                 | 444.5         | 18.71            | 65.12             | -30.3                             | 25.8                               | -141.6                          |
|                  | Arb12       | 39.92          | -8.15           | 396                 | 505.8         | 16.47            | 84.49             | -30.0                             | 24.7                               | -142.0                          |
|                  | Cob1        | 38.08          | -7.27           | 193                 | 440.7         | 18.52            | 142.85            | -29.0                             | 27.9                               | -154.7                          |
|                  | Cob3        | 37.94          | -7.44           | 229                 | 475.9         | 18.48            | 127.7             | -28.7                             | 24.5                               | -144.2                          |
|                  | Cob5        | 38.88          | -7.16           | 322                 | 475.9         | 18.18            | 153.94            | -28.9                             | 25.6                               | -149.0                          |
|                  | Cob8        | 38.17          | -7.76           | 157                 | 440.7         | 18.55            | 97.36             | -29.3                             | 25.4                               | -146.4                          |
|                  | Cob9        | 38.38          | -7.56           | 213                 | 440.7         | 18.55            | 120.6             | -29.7                             | 28.6                               | -138.5                          |
|                  | Cob10       | 40.38          | -7.93           | 364                 | 577.4         | 14.49            | 83.72             | -30.8                             | 25.4                               | -135.7                          |
|                  | Cob11       | 40.38          | -7.93           | 364                 | 577.4         | 14.49            | 83.72             | -29.9                             | 25.9                               | -138.3                          |
|                  | Cob12       | 40.38          | -7.93           | 364                 | 577.4         | 14.49            | 83.72             | -29.8                             | 27.0                               | -142.8                          |
|                  | Cob13       | 40.38          | -7.93           | 364                 | 577.4         | 14.49            | 83.72             | -30.2                             | 23.6                               | -141.5                          |
|                  | Verd1       | 37.94          | -7.44           | 229                 | 475.9         | 18.48            | 127.7             | -30.2                             | 25.0                               | -138.0                          |
|                  | Verd3       | 37.94          | -7.44           | 229                 | 475.9         | 18.48            | 127.7             | -29.7                             | 26.3                               | -134.4                          |
|                  | Car1        | 37.94          | -7.44           | 229                 | 475.9         | 18.48            | 127.7             | -31.3                             | 25.7                               | -145.1                          |
|                  | Car3        | 38.54          | -7.84           | 263                 | 440.7         | 18.55            | 88.91             | -29.5                             | 24.4                               | -145.4                          |

Table S1. Continue

| Country and year | Sample code | Latitude (UTM) | Longitude (UTM) | Altitude (m a.s.l.) | Rainfall (mm) | Temperature (°C) | Sea distance (km) | $\delta^{13}\text{C}$ (mUr, VPDB) | $\delta^{18}\text{O}$ (mUr, VSMOW) | $\delta^2\text{H}$ (mUr, VSMOW) |
|------------------|-------------|----------------|-----------------|---------------------|---------------|------------------|-------------------|-----------------------------------|------------------------------------|---------------------------------|
| Portugal<br>2017 | Cor1        | 38.08          | -7.27           | 193                 | 440.7         | 18.52            | 142.85            | -30.0                             | 26.1                               | -130.6                          |
|                  | Cor3        | 37.94          | -7.44           | 229                 | 475.9         | 18.48            | 127.7             | -28.8                             | 23.9                               | -142.8                          |
|                  | Cor5        | 38.54          | -7.84           | 263                 | 440.7         | 18.55            | 88.91             | -29.7                             | 27.6                               | -125.3                          |
|                  | Cor6        | 37.94          | -7.44           | 229                 | 475.9         | 18.48            | 127.7             | -29.8                             | 25.0                               | -143.4                          |
|                  | Cor9        | 40.38          | -7.93           | 364                 | 577.4         | 14.49            | 83.72             | -30.3                             | 23.4                               | -146.5                          |
|                  | Pic1        | 38.54          | -7.84           | 263                 | 440.7         | 18.55            | 88.91             | -29.6                             | 25.2                               | -143.0                          |
|                  | Pic3        | 38.88          | -7.16           | 322                 | 440.7         | 18.18            | 153.94            | -28.1                             | 25.2                               | -144.1                          |
|                  | Pic6        | 38.17          | -7.76           | 157                 | 440.7         | 18.55            | 97.36             | -30.4                             | 24.9                               | -147.0                          |
|                  | Mad1        | 38.88          | -7.16           | 322                 | 440.7         | 18.18            | 153.94            | -30.4                             | 25.6                               | -136.9                          |
|                  | Bla1        | 37.94          | -7.44           | 229                 | 475.9         | 18.48            | 127.7             | -30.1                             | 26.6                               | -131.6                          |
|                  | Bla4        | 38.88          | -7.16           | 322                 | 440.7         | 18.18            | 153.94            | -30.7                             | 28.0                               | -135.4                          |
| Bla7             | 40.38       | -7.93          | 364             | 577.4               | 14.49         | 83.72            | -29.2             | 25.2                              | -134.1                             |                                 |
| Turkey<br>2016   | AYV1        | 39.32          | 26.70           | 10                  | 637.1         | 18.24            | 5.86              | -27.8                             | 24.1                               | -141.0                          |
|                  | MEM1        | 38.45          | 27.22           | 50                  | 574.1         | 18.31            | 35.74             | -30.3                             | 25.9                               | -142.7                          |
|                  | TVY1        | 36.27          | 32.30           | 20                  | 724.7         | 22.2             | 1.88              | -30.6                             | 23.8                               | -134.6                          |
|                  | BEY1        | 36.78          | 31.45           | 9                   | 807.1         | 24.31            | 2.84              | -28.1                             | 25.3                               | -125.6                          |
|                  | DMT1        | 37.62          | 27.43           | 50                  | 470.1         | 19               | 24.6              | -29.6                             | 26.0                               | -159.0                          |
|                  | HAL1        | 36.10          | 34.20           | 416                 | 262.3         | 18.04            | 1                 | -28.8                             | 23.3                               | -143.0                          |
|                  | SUL1        | 36.92          | 34.85           | 23                  | 486.3         | 21.88            | 13.5              | -28.2                             | 24.4                               | -138.8                          |
|                  | HSB1        | 36.10          | 34.20           | 416                 | 262.3         | 18.04            | 1                 | -29.1                             | 22.1                               | -147.1                          |
|                  | NZP1        | 37.02          | 37.77           | 561                 | 397.6         | 16.88            | 143.89            | -29.5                             | 27.2                               | -131.5                          |
|                  | KLS1        | 36.70          | 37.10           | 709                 | 262.3         | 17.01            | 79.54             | -28.6                             | 26.7                               | -132.3                          |
| Turkey<br>2017   | AYV2        | 39.32          | 26.70           | 10                  | 759.7         | 17.79            | 5.86              | -28.4                             | 23.6                               | -158.9                          |
|                  | MEM2        | 38.45          | 27.22           | 50                  | 632.5         | 17.97            | 35.74             | -30.6                             | 23.7                               | -159.3                          |
|                  | TVY2        | 36.27          | 32.30           | 20                  | 738.5         | 21.76            | 1.88              | -29.5                             | 22.9                               | -135.1                          |
|                  | BEY2        | 36.78          | 31.45           | 9                   | 915.2         | 23.91            | 2.84              | -28.8                             | 24.0                               | -140.1                          |

Table S1. Continue

| Country and year | Sample code | Latitude (UTM) | Longitude (UTM) | Altitude (m a.s.l.) | Rainfall (mm) | Temperature (°C) | Sea distance (km) | $\delta^{13}\text{C}$ (mUr, VPDB) | $\delta^{18}\text{O}$ (mUr, VSMOW) | $\delta^2\text{H}$ (mUr, VSMOW) |
|------------------|-------------|----------------|-----------------|---------------------|---------------|------------------|-------------------|-----------------------------------|------------------------------------|---------------------------------|
|                  | GEM2        | 40.72          | 29.25           | 5                   | 718           | 15.96            | 1                 | -29.4                             | 22.5                               | -160.7                          |
|                  | DMT2        | 37.62          | 27.43           | 50                  | 693.4         | 18.68            | 24.6              | -29.4                             | 24.4                               | -178.1                          |
|                  | HAL2        | 36.10          | 34.20           | 416                 | 483.5         | 20.6             | 1                 | -28.7                             | 21.5                               | -159.7                          |
|                  | SUL2        | 36.92          | 34.85           | 23                  | 566.8         | 21.75            | 13.5              | -29.2                             | 23.6                               | -163.6                          |
|                  | HSB2        | 36.10          | 34.20           | 416                 | 483.5         | 20.6             | 1                 | -29.3                             | 23.4                               | -154.9                          |
|                  | NZP2        | 37.02          | 37.77           | 561                 | 278           | 17.21            | 143.89            | -27.7                             | 28.1                               | -136.5                          |
|                  | KLS2        | 36.70          | 37.10           | 709                 | 204           | 16.91            | 79.54             | -29.0                             | 24.7                               | -158.7                          |

AG – Aglandau; CA – Cailletier; OL – Olivière; PI – Picholine; SA – Salonenque; TA – Tanche; Cob – Cobrançosa; Cor – Cordovil de Serpa; Gal – Galega Vulgar; Verd – Verdeal Alentejana; Bla – Blanqueta; Mad – Madural; Arb – Arbequina; Car – Carrasquenha, Azei – Azeiteira; Pic – Picual; AYV – Ayvalik; MEM – Memecik; TVY – Tavsan Yuregi; BEY – Beilik; GEM – Gemlik; DMT – Domat; HAL – Halhali; SUL – Sariulak; HSB – Hasebi; NZP – Nizip Yaglik; KLS – Killis Yaglik.

Table S2. Average and Standard deviation of Temperature and Rainfall in France, Portugal and Turkey in two years (2016 and 2017). Alteration of rainfall amount (%).

| Country  | Year | Temperature (°C) | Rainfall (mm)            | Rainfall (%) alteration |
|----------|------|------------------|--------------------------|-------------------------|
| France   | 2016 | 14.8±1.8         | 700.8±152.8 <sup>a</sup> | 30.64*                  |
|          | 2017 | 15.2±1.8         | 486.1±143.3 <sup>b</sup> |                         |
| Portugal | 2016 | 17.9±0.3         | 688.2±26.4 <sup>a</sup>  | 31.06*                  |
|          | 2017 | 17.6±1.6         | 474.4±53.1 <sup>b</sup>  |                         |
| Turkey   | 2016 | 19.4±2.5         | 488.4±196.9 <sup>a</sup> | -20.49                  |
|          | 2017 | 19.4±2.5         | 588.5±213.3 <sup>a</sup> |                         |

One-way ANOVA. The different letters indicate significant ( $P < 0.05$ ) differences between years according to the Tukey test.

\* Significant alteration of the rainfall amount ( $P < 0.05$ )

Table S3. Principal component loading scores

| Principal Components | Eigenvalue | Percentage of variance | Cumulative percentage |
|----------------------|------------|------------------------|-----------------------|
| 1                    | 2.64       | 29.35                  | 29.35                 |
| 2                    | 1.89       | 20.95                  | 50.31                 |
| 3                    | 1.56       | 17.37                  | 67.68                 |
| 4                    | 0.91       | 10.06                  | 77.74                 |
| 5                    | 0.69       | 7.65                   | 85.39                 |
| 6                    | 0.60       | 6.66                   | 92.05                 |
| 7                    | 0.48       | 5.27                   | 97.32                 |
| 8                    | 0.16       | 1.82                   | 99.14                 |
| 9                    | 0.08       | 0.86                   | 100                   |

Table S4. Variable standardized canonical discriminant function coefficients along with discriminant functions classification parameters.

| Variables             | VOOs from 2016 |        | VOOs from 2017 |        |
|-----------------------|----------------|--------|----------------|--------|
|                       | Function       |        | Function       |        |
|                       | 1              | 2      | 1              | 2      |
| $\delta^2\text{H}$    | 0.965*         | 0.260  | 0.330          | 0.768* |
| $\delta^{18}\text{O}$ | -0.004         | 0.927* | 0.889*         | -0.347 |
| $\delta^{13}\text{C}$ | -0.113         | 0.485* | -0.259*        | -0.227 |
| Eigenvalue            | 1.108          | 0.257  | 2.821          | 0.139  |
| % of Variance         | 81.2           | 18.8   | 95.3           | 4.7    |
| Cumulative %          | 81.2           | 100.0  | 95.3           | 100.0  |
| Canonical Correlation | 0.725          | 0.452  | 0.859          | 0.350  |

\* Largest absolute correlation between each variable and any discriminant function

Table S5. Overall classification performance (count and %) of the LDA model, with and without cross validation (CV), for the three countries differentiation study.

| Original class  | Predicted class (LDA model) |             |             |             |            |           |
|-----------------|-----------------------------|-------------|-------------|-------------|------------|-----------|
|                 | France                      |             | Portugal    |             | Turkey     |           |
|                 | Without CV                  | With CV     | Without CV  | With CV     | Without CV | With CV   |
| France (2016)   | 17 (68.0%)                  | 16 (64.0%)  | 6 (24.0%)   | 7 (28.0%)   | 2 (8.0%)   | 2 (8.0%)  |
| France (2017)   | 25 (100.0%)                 | 25 (100.0%) | 0 (0.0%)    | 0 (0.0%)    | 0 (0.0%)   | 0 (0.0%)  |
| Portugal (2016) | 0 (0.0%)                    | 0 (0.0%)    | 26 (96.3%)  | 25 (92.6%)  | 1 (3.7%)   | 2 (7.4%)  |
| Portugal (2017) | 0 (0.0%)                    | 0 (0.0%)    | 39 (100.0%) | 39 (100.0%) | 0 (0.0%)   | 0 (0.0%)  |
| Turkey (2016)   | 1 (10.0%)                   | 1 (10.0%)   | 3 (30.0%)   | 4 (40.0%)   | 6 (60.0%)  | 5 (50.0%) |
| Turkey (2017)   | 2 (18.2%)                   | 2 (18.2%)   | 4 (36.4%)   | 4 (36.4%)   | 5 (45.5%)  | 5 (45.5%) |
